24 **Abstract**

25 Bacterial membrane lipids are critical for membrane bilayer formation, cell division,  
26 protein localization, stress responses, and pathogenesis. Despite their critical roles,  
27 membrane lipids have not been fully elucidated for many pathogens. Here, we report the  
28 discovery of a novel cationic glycolipid, Lysyl-Glucosyl-Diacylglycerol (Lys-Glc-DAG) that  
29 is synthesized in high abundance by the bacterium *Streptococcus agalactiae* (Group  
30 B *Streptococcus*, GBS). To our knowledge, Lys-Glc-DAG is more positively charged than  
31 any other known lipids. Lys-Glc-DAG carries two positive net charges per molecule,  
32 distinct from the widely described lysylated phospholipid Lysyl-phosphatidylglycerol (Lys-  
33 PG) which carries one positive net charge due to the presence of a negatively charged  
34 phosphate moiety. We use normal phase liquid chromatography (NPLC) coupled with  
35 electrospray ionization (ESI) high-resolution tandem mass spectrometry (HRMS/MS) and  
36 genetic approaches to determine that Lys-Glc-DAG is synthesized by the enzyme MprF  
37 in GBS, which covalently modifies the neutral glycolipid Glc-DAG with the cationic amino  
38 acid lysine. GBS is a leading cause of neonatal meningitis, which requires traversal of the  
39 endothelial blood-brain barrier (BBB). We demonstrate that GBS strains lacking *mprF*  
40 exhibit a significant decrease in the ability to invade BBB endothelial cells. Further, mice  
41 challenged with a *GBSΔmprF* mutant developed bacteremia comparably to Wild-Type  
42 infected mice yet had less recovered bacteria from brain tissue and a lower incidence of  
43 meningitis. Thus, our data suggest that Lys-Glc-DAG may contribute to bacterial uptake  
44 into host cells and disease progression. Importantly, our discovery provides a platform for  
45 further study of cationic lipids at the host-pathogen interface.

46

## 47 **Introduction**

48 Bacterial cellular membranes are dynamic structures that are critical for survival under  
49 varying environmental conditions and are essential for host-pathogen interactions.  
50 Phospholipids and glycolipids within the membrane have varying chemical properties that  
51 alter the physiology of the membrane, which bacteria can modulate in response to  
52 environmental stresses such as pH (1), antibiotic treatment (2), and human metabolites  
53 (3). Despite their critical roles in the survival and pathogenesis, membrane lipids have not  
54 been carefully characterized using modern lipidomic techniques for many important  
55 human pathogens, including *Streptococcus agalactiae* (Group B *Streptococcus*; GBS).  
56 GBS colonizes the lower genital and gastrointestinal tracts of ~30% of healthy women (4,  
57 5). However, GBS can cause sepsis and pneumonia in newborns and is a leading cause  
58 of neonatal meningitis, resulting in long-lasting neurological effects in survivors (6-8). Due  
59 to the severity of the resulting diseases, intrapartum antibiotic prophylaxis is prescribed  
60 for colonized pregnant women (7, 9). Even with these measures, a more complete  
61 understanding of GBS pathogenesis and new therapeutic and preventive measures are  
62 needed to mitigate the devastating impact of GBS neonatal infection.

63

64 Research on the pathogenesis of the GBS has mainly focused on cell wall-anchored or  
65 secreted proteins and polysaccharides that aid in the attachment to and invasion of host  
66 cells. The numerous attachment and virulence factors possessed by the GBS are  
67 summarized in a recent review by Armistead *et al* 2019 (10). Comparatively little is known  
68 about GBS cellular membrane lipids. To our knowledge, the only characterization of GBS  
69 lipids prior to our current study was the identification of the phospholipids

70 phosphatidylglycerol (PG), cardiolipin (CL), and lysyl-phosphatidylglycerol (Lys-PG) in  
71 GBS (11-13). Similarly, investigation into the glycolipids of the GBS membrane has  
72 focused on di-glucosyl-diacylglycerol (Glc<sub>2</sub>-DAG), which is the lipid anchor of the Type I  
73 lipoteichoic acid, and its role in pathogenesis (14).

74

75 In this study, we utilized normal phase liquid chromatography (NPLC) coupled with  
76 electrospray ionization (ESI) high-resolution tandem mass spectrometry (HRMS/MS) to  
77 characterize the GBS membrane lipid composition, and identified a novel cationic  
78 glycolipid, lysyl-glucosyl-diacylglycerol (Lys-Glc-DAG), which comprises a major portion  
79 of the GBS total lipid extract. While Lys-PG has been reported in a range of bacterial  
80 species (15), Lys-Glc-DAG represents, to our knowledge, the first example of lysine  
81 modification of a neutral glycolipid. By gene deletion and heterologous expression, we  
82 show the GBS MprF enzyme is responsible for the biosynthesis of both the novel Lys-  
83 Glc-DAG and Lys-PG. Most strikingly, using an *in vivo* hematogenous murine infection  
84 model, we demonstrate that MprF does not contribute to GBS bloodstream survival. This  
85 distinguishes the GBS MprF from the well-known *Staphylococcus aureus* MprF, which  
86 synthesizes only Lys-PG (16, 17). Rather, GBS MprF contributes specifically to meningitis  
87 and penetration of the blood-brain barrier. These results greatly expand our knowledge  
88 of naturally occurring lipids and MprF functionality and reveal insights into the  
89 pathogenesis of meningitis caused by GBS.

90

## 91 **Results**

### 92 **Identification of Lys-Glc-DAG, a novel cationic glycolipid in GBS**

93 The membrane lipids of three GBS clinical isolates of representative serotypes were  
94 characterized: COH1 (18), A909 (19), CNCTC 10/84 and CJB111 (20) (serotypes III, 1a,  
95 and V, respectively). Common Gram-positive bacterial lipids were identified by normal  
96 phase LC coupled with negative ion ESI/MS/MS, including diacylglycerol (DAG),  
97 monohexosyldiacylglycerol (MHDAG), dihexosyldiacylglycerol (DHDAG),  
98 phosphatidylglycerol (PG), and lysyl-phosphatidylglycerol (Lys-PG), as shown by the  
99 negative total ion chromatogram (TIC) (Fig. 1A).

100

101 Surprisingly, the positive TIC (Fig. 1B, S1 Fig) shows highly abundant peaks of unknown  
102 identity at the retention time ~25-29 min. The mass spectra (Fig. 1C) and LC retention  
103 times of this lipid do not match with any other bacterial lipids we have analyzed or exact  
104 masses in lipidomic databases (21, 22). Tandem MS (MS/MS) in the positive ion mode  
105 (Fig. 1D), negative ion mode (Fig. 1E), and high-resolution mass measurement (Fig. 1C)  
106 allowed us to propose lysyl-glucosyl-diacylglycerol (Lys-Glc-DAG) (Fig. 1F) as the  
107 structure of this unknown lipid. Observed and exact masses of Lys-Glc-DAG are shown  
108 in S1 Table. The assignment of glucose was based on the observation that glucosyl-  
109 diacylglycerol (Glc-DAG) is a major membrane component of GBS and other streptococci  
110 (14), and results from an isotopic labeling experiment using  $^{13}\text{C}$ -labeled glucose  
111 (Glucose- $^{13}\text{C}_6$ ). The assignment of lysine modification was supported by an isotopic  
112 labeling experiment with deuterated lysine (lysine- $d_4$ ). The expected mass shifts (+4 Da)  
113 were observed in both molecular ions and MS/MS product ions (S2 Fig). Comparison of  
114 both MS/MS spectra of labeled (Glucose- $^{13}\text{C}_6$ ) and unlabeled Lys-Glc-DAG indicates the  
115 lysine residue is linked to the 6-position of glucose (S2 Fig). Lys-Glc-DAG consists of

116 several molecular species with different fatty acyl compositions resulting in different  
117 retention times and multiple, unresolved TIC peaks (~25-29 min).

118

### 119 **GBS MprF synthesizes Lys-Glc-DAG**

120 The enzyme MprF (multiple peptide resistance factor) catalyzes the aminoacylation of PG  
121 with lysine in some Gram-positive pathogens (16, 23). We determined that GBS MprF is  
122 responsible and sufficient for synthesizing Lys-Glc-DAG as well as Lys-PG. Deletion of  
123 *mprF* from both COH1 and CJB111 abolishes Lys-Glc-DAG and Lys-PG synthesis, which  
124 are restored by complementation (Fig. 1G, S3 Fig). Deletion of GBS *mprF* does not confer  
125 a growth defect in Todd-Hewitt broth or tissue culture medium. The oral colonizer  
126 *Streptococcus mitis* does not encode *mprF* or synthesize Lys-PG but synthesizes Glc-  
127 DAG and PG (2, 3). Heterologous expression of GBS *mprF* in *S. mitis* results in Lys-Glc-  
128 DAG and Lys-PG production (Fig. 1H), while expression of *Enterococcus faecium mprF*  
129 results in only Lys-PG production (Fig. 1H), as expected (1). Biosynthetic pathways  
130 involving MprF are shown in Fig. 1I.

131

### 132 **MprF contributes to GBS pathogenesis**

133 We investigated whether MprF contributes to GBS invasion into brain endothelial cells  
134 and development of meningitis. To mimic the human blood-brain barrier (BBB), we utilized  
135 the human cerebral microvascular endothelial cell line hCMEC/D3. *In vitro* assays for  
136 adhesion and invasion were performed as described previously (14, 24, 25). There was  
137 no significant difference in the ability of  $\Delta mprF$  compared to WT and complement cells to  
138 attach to hCMEC/D3 cells (Fig. 2A). However, we observed a significant decrease in the

139 amount of  $\Delta mprF$  recovered from the intracellular compartment of hCMEC/D3 cells (Fig.  
140 2A). The reduced invasion phenotype was confirmed in the hypervirulent serotype V  
141 strain, CJB111 (26, 27) (S4 Fig). Intracellular survival requires GBS to survive low pH  
142 conditions in lysosomes (pH 4.5 – 5.5) (28), and  $\Delta mprF$  is unable to survive low pH  
143 conditions (Fig. 2B). This suggests that MprF promotes GBS invasion and possibly  
144 intracellular survival in brain endothelial cells.

145

146 We hypothesized that these *in vitro* phenotypes of  $\Delta mprF$  would translate into a  
147 diminished ability to penetrate the BBB and produce meningitis *in vivo*. Using our  
148 standard model of GBS hematogenous meningitis (14, 24) mice were challenged with  
149 either WT GBS or  $\Delta mprF$ . Mice were sacrificed at 72 h to determine bacterial loads in  
150 blood, lung and brain tissue. We recovered significantly less CFU in the brains of  $\Delta mprF$ -  
151 infected mice compared to the WT-infected mice (Fig. 2C). However, there was no  
152 significant difference in CFU recovered from the bloodstream or the lung (Fig. 2D,E),  
153 demonstrating that  $\Delta mprF$  does not have a general defect in bloodstream survival or  
154 tissue invasion *in vivo*. Furthermore, mice challenged with WT GBS had significantly more  
155 meningeal thickening and neutrophil chemokine, KC, in brain homogenates compared to  
156  $\Delta mprF$  mutant-infected animals (Fig. 2F-H). Taken together, *mprF* contributes to GBS  
157 penetration into the brain and to the pathogenesis of meningitis *in vivo*.

158

## 159 **Discussion**

160 Here, we report that GBS MprF uniquely synthesizes a novel cationic glycolipid Lys-Glc-  
161 DAG in high abundance plays a role in the invasion of human endothelial cells. This work

162 establishes that GBS capitalizes on MprF to modulate charges of both glycolipids and  
163 phospholipids at the membrane, which is unprecedented

164

165 Previously MprF has been shown to catalyze the aminoacylation of the anionic  
166 phospholipid PG in a range of Gram-positive and Gram-negative bacteria (16, 23). MprF  
167 is a membrane-bound enzyme comprised of a N-terminal lipid flippase domain (29) and  
168 a C-terminal catalytic domain that catalyzes the aminoacylation of the glycerol group of  
169 PG by using aminoacyl-tRNAs as the amino acid donors (30-32). An important function  
170 of PG aminoacylation is proposed to decrease the net negative charge of the cellular  
171 envelope to confer protection from cationic antimicrobial peptides (CAMPs) produced by  
172 host immune systems and bacteriocins produced by competitor bacteria (16, 23).  
173 However, a previous study observed no contribution of *mprF* to GBS *in vitro* susceptibility  
174 to commonly studied CAMPs, which is unlike the well-characterized *S. aureus mprF* (33),  
175 thus highlighting the unique differences between the extracellular surface of these  
176 bacteria.

177

178 Based on our tissue culture and mouse infection experiments, we propose that GBS have  
179 an MprF enzyme and corresponding cellular lipid properties that are adapted for efficient  
180 invasion of mammalian cells. Deletion of *mprF* impacts the ability of GBS to enter the  
181 brain and promote meningitis *in vivo*. This suggests that MprF plays a role in BBB  
182 penetration and not invasion into the lung, however additional studies are warranted to  
183 examine other tissue sites. It is unknown how lysinylated lipids in the GBS membrane,  
184 which is covered by a layer of peptidoglycan, mechanistically impact invasion. Because



185 Lys-Glc-DAG is abundantly synthesized by GBS MprF, with Lys-PG a comparatively  
186 minor product, it is likely that Lys-Glc-DAG is the most relevant lipid for meningitis  
187 pathogenesis. Speculatively, Lys-Glc-DAG may contribute to membrane vesicle (MV)  
188 formation by GBS. MVs have previously been shown to be pro-inflammatory and result  
189 in preterm birth and fetal death in mice (34), but have not been studied during meningitis  
190 progression. In future studies, it will be key to investigate this, as well as the specific host  
191 inflammatory and signaling responses to the GBS *mprF* mutant.

192

193 Our identification of the novel Lys-Glc-DAG glycolipid rationalizes further study of the  
194 lipidomes of human pathogens. First, lipids contribute to virulence, and understanding  
195 these virulence mechanisms and the mechanisms for lipid synthesis may identify novel  
196 antimicrobial drug targets. The decreased *in vivo* pathogenicity of the  $\Delta mprF$  mutant  
197 identifies GBS MprF as a candidate for targeting by antimicrobial strategies. Moreover,  
198 Lys-Glc-DAG could be utilized as a specific molecular biomarker for GBS diagnostics. In  
199 addition, engineered cationic lipids are utilized in lipid nanoparticles for mRNA vaccine  
200 and drug delivery and are required for uptake of particles into cells (35, 36). Substantial  
201 effort has been dedicated to the synthesis of cationic lipids with low toxicity and efficient  
202 delivery properties. Lys-Glc-DAG is a naturally occurring, strongly cationic lipid with  
203 potential for use in lipid nanoparticles for vaccine and drug delivery. Importantly, our  
204 discovery suggests that lipidome analysis of human pathogens is likely to reveal novel  
205 lipids of biotechnological utility.

206

207 **Materials and methods**

## 208 **Bacterial strains, media, and growth conditions**

209 See S2 Table for strains used in this study. GBS strains were grown statically at 37°C in  
210 Todd-Hewitt Broth (THB) and *S. mitis* strains were grown statically at 37°C and 5% CO<sub>2</sub>,  
211 unless otherwise stated. Streptococcal chemically defined medium (37) was diluted from  
212 stock as described (38) with 1% w/v glucose (referred to as DM), slightly modified from  
213 (39), unless otherwise stated. *Escherichia coli* strains were grown in Lysogeny Broth (LB)  
214 at 37°C with rotation at 225 rpm. Kanamycin and erythromycin (Sigma-Aldrich) were  
215 supplemented to media at 50 µg/mL and 300 µg/mL for *E. coli*, respectively, or 300 µg/mL  
216 and 5 µg/mL, respectively, for streptococcal strains.

217

## 218 **Routine molecular biology techniques**

219 All PCR reactions utilized Phusion polymerase (Thermo Fisher). PCR products and  
220 restriction digest products were purified using GeneJET PCR purification kit (Thermo  
221 Fisher) per manufacturer protocols. See S3 Table for primers. Plasmids were extracted  
222 using GeneJET plasmid miniprep kit (Thermo Fisher) per manufacturer protocols.  
223 Restriction enzyme digests utilized XbaI, XhoI, and PstI (New England Biolabs) for 3 h at  
224 37°C in a water bath. Ligations utilized T4 DNA ligase (New England Biolabs) at 16°C  
225 overnight or Gibson Assembly Master Mix (New England Biolabs) per manufacturer  
226 protocols where stated. All plasmid constructs were sequence confirmed by Sanger  
227 sequencing (Massachusetts General Hospital DNA Core or CU Anschutz Molecular  
228 Biology Core).

229

## 230 **Deuterated lysine and <sup>13</sup>C<sub>6</sub>-D-glucose isotope tracking**

231 A GBS COH1 colony was inoculated into 15 mL of DM containing 450  $\mu$ M lysine-*d*4  
232 (Cambridge Isotopes Laboratories) or a single COH1 colony was inoculated into 10 mL  
233 DM supplemented with 0.5% w/v  $^{13}\text{C}_6\text{D}$ -glucose (U-13C6, Cambridge Isotopes  
234 Laboratories) for overnight growth for lipidomic analysis described below.

235

### 236 **Construction of MprF expression plasmids**

237 Genomic DNA was isolated using the Qiagen DNeasy Blood and Tissue kit per the  
238 manufacturer's protocol with the exception that cells were pre-treated with 180  $\mu$ L 50  
239 mg/mL lysozyme, 25  $\mu$ L 2500 U/mL mutanolysin, and 15  $\mu$ L 20 mg/mL pre-boiled RNase  
240 A and incubated at 37°C for 2 h. The *mprF* genes from GBS COH1, (GBSCOH1\_1931),  
241 GBS CJB111 (ID870\_10050), and *E. faecium* 1,231,410 (EFTG\_00601) were amplified  
242 and either Gibson ligated into pABG5 $\Delta$ *phoZ* (40) or ligated into pDCerm (41). Plasmid  
243 constructs were transformed into chemical competent *E. coli*. Briefly, chemically  
244 competent cells were incubated for 10 min on ice with 5  $\mu$ L of Gibson reaction before heat  
245 shock at 42°C for 70 sec, then placed on ice for 2 min before 900  $\mu$ L of cold SOC medium  
246 was added. Outgrowth was performed at 37°C, with shaking at 225 rpm, for 1 h. Cultures  
247 were plated on LB agar plates containing 50  $\mu$ g/mL kanamycin. Colonies were screened  
248 by PCR for presence of the *mprF* insert.

249

### 250 **Expression of *mprF* in *S. mitis***

251 Natural transformation was performed as previously described (3). Briefly, precultures  
252 were thawed at room temperature, diluted in 900  $\mu$ L of THB, further diluted 1:50 in  
253 prewarmed 5 mL THB, and incubated for 45 min at 37°C. 500  $\mu$ L of culture was then

254 aliquoted with 1  $\mu$ L of 1 mg/ml competence-stimulating peptide (EIRQTHNIFFNFFKRR)  
255 and 1  $\mu$ g/mL plasmid. Transformation reaction mixtures were cultured for 2 h at 37°C in  
256 microcentrifuge tubes before being plated on THB agar supplemented with 300  $\mu$ g/mL  
257 kanamycin. Single transformant colonies were cultured in 15 mL THB overnight. PCR  
258 was used to confirm the presence of the *mprF* insert on the plasmid. Plasmids were  
259 extracted and sequence confirmed as described above. Lipidomics was performed as  
260 described below in biological triplicate.

261

### 262 **Construction of *mprF* deletion plasmids**

263 Regions ~2 kb upstream and downstream of the GBS COH1 *mprF* (GBSCOH1\_1931) or  
264 CJB111 (ID870\_10050) were amplified using PCR. Plasmid, pMBSacB (42), and the  
265 PCR products were digested using appropriate restriction enzymes and ligated overnight.  
266 7  $\mu$ L of the ligation reaction was transformed into chemically competent *E. coli* DH5 $\alpha$  as  
267 described above, except that outgrowth was performed at 28°C with shaking at 225 rpm  
268 for 90 min prior to plating on LB agar supplemented with 300  $\mu$ g/mL erythromycin. Plates  
269 were incubated at 28°C for 72 h. Colonies were screened by PCR for correct plasmid  
270 construction. Positive colonies were inoculated into 50 mL LB media containing antibiotic  
271 and incubated at 28°C with rotation at 225 rpm for 72 h. Cultures were pelleted using a  
272 Sorvall RC6+ centrifuge at 4,280  $\times$  *g* for 6 min at room temperature. Plasmid was  
273 extracted as described above except the cell pellet was split into 5 columns to prevent  
274 overloading and serially eluted into 50  $\mu$ L. Plasmid construction was confirmed via  
275 restriction digest using XhoI and XbaI, and the insert was PCR amplified and sequence-  
276 verified.

277

## 278 **Generation of electrocompetent GBS cells for *mprF* knockout**

279 Electrocompetent cells were generated as described (42) with minor modifications.  
280 Briefly, a GBS COH1 or CJB111 colony was inoculated in 5 mL M17 medium (BD Bacto)  
281 with 0.5% glucose and grown overnight at 37°C. The 5 mL was used to inoculate a second  
282 overnight culture of 50 mL pre-warmed filter-sterilized M17 medium containing 0.5%  
283 glucose, 0.6% glycine, and 25% PEG 8000. The second overnight was added to 130 mL  
284 of the same medium and grown for 1 h at 37°C. Cells were pelleted at 3,200 x g in a  
285 Sorvall RC6+ at 4°C for 10 min. Cells were washed twice with 25 mL cold filter-sterilized  
286 GBS wash buffer containing 25% PEG 8000 and 10% glycerol in water, and pelleted as  
287 above. Cell pellets were re-suspended in 1 mL GBS wash buffer and either used  
288 immediately for transformation or stored in 100 µL aliquots at -80°C until use.

289

## 290 **Deletion of GBS COH1 and CJB111 *mprF***

291 Electrocompetent cells were generated as described (42) with minor modifications. The  
292 double crossover homologous recombination knockout strategy was performed as  
293 described previously (25, 42, 43) with minor modifications. 1 µg of plasmid was added to  
294 electrocompetent GBS cells and transferred to a cold 1 mm cuvette (Fisher or BioRad).  
295 Electroporation was carried out at 2.5 kV on an Eppendorf eporator. 1 mL of THB  
296 containing 12.5% PEG 8000, 20 mM MgCl<sub>2</sub>, and 2 mM CaCl<sub>2</sub> was immediately added  
297 and then the entire reaction was transferred to a glass culture tube. Outgrowth was at  
298 28°C for 2 h followed by plating on THB agar supplemented with 5 µg/mL erythromycin.  
299 Plates were incubated for 48 h at 28°C. A single colony was cultured overnight in 5 mL

300 THB with 5 µg/mL erythromycin at 28°C. The culture was screened via PCR for the  
301 plasmid insert with the initial denaturing step extended to 10 min. The overnight culture  
302 was diluted 1:1000 THB containing 5 µg/mL erythromycin and incubated overnight at  
303 37°C to promote single cross over events. The culture was then serial diluted and plated  
304 on THB agar plates with antibiotic and incubated at 37°C overnight. Colonies were  
305 screened for single crossover events by PCR. Single crossover colonies were inoculated  
306 in 5 mL THB at 28°C to promote double crossover events. Overnight cultures were diluted  
307 1:1000 into 5 mL THB containing sterile 0.75 M sucrose and incubated at 37°C. Overnight  
308 cultures were serial diluted and plated on THB agar and incubated at 37°C overnight.  
309 Colonies were patched onto THB agar with and without 5 µg/mL erythromycin to confirm  
310 loss of plasmid. Colonies were also screened by PCR for the loss of *mprF*. Colonies  
311 positive for the loss of *mprF* were inoculated into 5 mL THB at 37°C. Cultures were  
312 stocked and gDNA extracted as described above, with minor modifications. Sequence  
313 confirmation of the *mprF* knockout was done via Sanger sequencing (Massachusetts  
314 General Hospital DNA Core or CU Anschutz Molecular Biology Core). The mutant was  
315 grown overnight in 15 mL THB at 37°C and pelleted at 6,150 x g for 5 min in a Sorvall  
316 RC6+ centrifuge at room temperature for lipid extraction as described. Genomic DNA of  
317 COH1Δ*mprF* was isolated as described above and whole genome sequencing was  
318 performed in paired-end reads (2 by 150 bp) on the Illumina NextSeq 550 platform at the  
319 Microbial Genome Sequencing Center (Pittsburgh, PA). Illumina sequence reads are  
320 deposited in the Sequence Read Archive, accession PRJNA675025.

321

322 **Complementation of *mprF* in COH1Δ*mprF* and CJB111Δ*mprF***

323 Electrocompetent GBS strains were generated as previously described (44). Briefly,  
324 GBS $\Delta$ *mprF* was inoculated into 5 mL THB with 0.6% glycine and grown overnight. The  
325 culture was expanded to 50 mL in pre-warmed THB with 0.6% glycine and grown to an  
326 OD<sub>600</sub> nm of 0.3 and pelleted for 10 min at 3200 x *g* at 4°C in a Sorvall RC6+ floor  
327 centrifuge. The pellet was kept on ice through the remainder of the protocol. The pellet  
328 was washed twice with 25 mL and once with 10 mL of cold 0.625 M sucrose and pelleted  
329 as above. The cell pellet was resuspended in 400  $\mu$ L of cold 20% glycerol, aliquoted in  
330 50  $\mu$ L aliquots, and used immediately or stored at -80°C until use. Electroporation was  
331 performed as described above, with recovery in THB supplemented with 0.25 M sucrose,  
332 and plated on THB agar with kanamycin at 300  $\mu$ g/mL.

333

#### 334 **Acidic Bligh-Dyer extractions**

335 Centrifugation was performed using a Sorvall RC6+ centrifuge. Cultures were pelleted at  
336 4,280 x *g* for 5 min at room temperature unless otherwise stated. The supernatants were  
337 removed, and cell pellets were stored at -80°C until acidic Bligh-Dyer lipid extractions  
338 were performed as described (3). Briefly, cell pellets were resuspended in 1X PBS  
339 (Sigma-Aldrich) and transferred to Corning Pyrex glass tubes with PTFE-lined caps  
340 (VWR), followed by 1:2 vol:vol chloroform:methanol addition. Single phase extractions  
341 were vortexed periodically and incubated at room temperature for 15 minutes before 500  
342 x *g* centrifugation for 10 min. A two-phase Bligh-Dyer was achieved by addition of 100  $\mu$ L  
343 37% HCl, 1 mL CHCl<sub>3</sub>, and 900  $\mu$ L of 1X PBS, which was then vortexed and centrifuged  
344 for 5 min at 500 x *g*. The lower phase was removed to a new tube and dried under nitrogen  
345 before being stored at -80°C prior to lipidomic analysis.

346

## 347 **Liquid Chromatography/Electrospray Ionization Mass Spectrometry**

348 Normal phase LC was performed on an Agilent 1200 quaternary LC system equipped  
349 with an Ascentis silica HPLC column (5  $\mu\text{m}$ ; 25 cm by 2.1 mm; Sigma-Aldrich) as  
350 described previously (45, 46). Briefly, mobile phase A consisted of chloroform-methanol-  
351 aqueous ammonium hydroxide (800:195:5, vol/vol), mobile phase B consisted of  
352 chloroform-methanol-water-aqueous ammonium hydroxide (600:340:50:5, vol/vol), and  
353 mobile phase C consisted of chloroform-methanol-water-aqueous ammonium hydroxide  
354 (450:450:95:5, vol/vol). The elution program consisted of the following: 100% mobile  
355 phase A was held isocratically for 2 min, then linearly increased to 100% mobile phase B  
356 over 14 min, and held at 100% mobile phase B for 11 min. The LC gradient was then  
357 changed to 100% mobile phase C over 3 min, held at 100% mobile phase C for 3 min,  
358 and, finally, returned to 100% mobile phase A over 0.5 min and held at 100% mobile  
359 phase A for 5 min. The LC eluent (with a total flow rate of 300  $\mu\text{l}/\text{min}$ ) was introduced into  
360 the ESI source of a high-resolution TripleTOF5600 mass spectrometer (Sciex,  
361 Framingham, MA). Instrumental settings for negative-ion ESI and MS/MS analysis of lipid  
362 species were: IS = -4,500 V, CUR = 20 psi, GSI = 20 psi, DP = -55 V, and FP = -150V.  
363 Settings for positive-ion ESI and MS/MS analysis were: IS = +5,000 V, CUR = 20 psi, GSI  
364 = 20 psi, DP = +55 V, and FP = +50V. The MS/MS analysis used nitrogen as the collision  
365 gas. Data analysis was performed using Analyst TF1.5 software (Sciex, Framingham,  
366 MA).

367

## 368 **pH-adjusted THB growth**



369 Approximately 30 mL of fresh THB were adjusted to different pH values, measured using  
370 a Mettler Toledo FiveEasy pH/MV meter, and sterile-filtered using 0.22  $\mu$ M syringe filters.  
371 A final volume of 200  $\mu$ L culture medium was aliquoted per well in a flat-bottom 96 well  
372 plate (Falcon); culture media were not supplemented with antibiotics. Overnight cultures  
373 of GBS strains were used to inoculate the wells to a starting OD<sub>600nm</sub> 0.02 per well. Plates  
374 were incubated for 24 h at 37°C before OD<sub>600nm</sub> was read using a BioTek MX Synergy 2  
375 plate reader. This experiment was performed in biological triplicate.

376

### 377 **hCMEC cell adherence and invasion assays**

378 Human Cerebral Microvascular Endothelial cells hCMEC/D3 (obtained from Millipore)  
379 were grown in EndoGRO-MV complete media (Millipore, SCME004) supplemented with  
380 5% fetal bovine serum (FBS) and 1 ng/ml fibroblast growth factor-2 (FGF-2; Millipore).  
381 Cells were grown in tissue culture treated 24 well plates and 5% CO<sub>2</sub> at 37°C.

382

383 Assays to determine the total number of bacteria adhered to host cells or intracellular  
384 bacteria were performed as described previously (24, 25). Briefly, bacteria were grown to  
385 mid log phase (OD<sub>600nm</sub> 0.4-0.5) and normalized to  $1 \times 10^8$  to infect cell monolayers at a  
386 multiplicity of infection (MOI) of 1 ( $1 \times 10^5$  CFU per well). The total cell-associated GBS  
387 were recovered after 30 min incubation. Cells were washed slowly five times with 500  $\mu$ L  
388 1X PBS (Sigma) and detached by addition of 100  $\mu$ L of 0.25% trypsin-EDTA solution  
389 (Gibco) and incubation for 5 min before lysing the eukaryotic cells with the addition of 400  
390  $\mu$ L of 0.025% Triton X-100 (Sigma) and vigorous pipetting. The lysates were then serially  
391 diluted and plated on THB agar and incubated overnight to determine CFU. Bacterial

392 invasion assays were performed as described above except infection plates were  
393 incubated for 2 h before incubation with 100 µg gentamicin (Sigma) and 5 µg penicillin  
394 (Sigma) supplemented media for an additional 2 h to kill all extracellular bacteria, prior to  
395 being trypsinized, lysed, and plated as described. Experiments were performed in  
396 biological triplicate with four technical replicates per experiment.

397

### 398 **Murine model of GBS hematogenous meningitis**

399 All animal experiments were conducted under the approval of the Institutional Animal  
400 Care and Use Committee (#00316) at the University of Colorado Anschutz Medical  
401 Campus and performed using accepted veterinary standards. The murine meningitis  
402 model was performed as previously described (25, 47, 48). Briefly, 7-week-old male  
403 CD1 (Charles River) mice were challenged intravenously with  $1 \times 10^9$  CFU of WT COH1  
404 or the isogenic  $\Delta mprF$  mutant. At 72 h post-infection, mice were euthanized and blood,  
405 lung and brain tissue were harvested, homogenized, and serially diluted on THB agar  
406 plates to determine bacterial CFU.

407

### 408 **Histology and ELISA**

409 Mouse brain tissue was frozen in OCT compound (Sakura) and sectioned using a  
410 CM1950 cryostat (Leica). Sections were stained using hematoxylin and eosin (Sigma)  
411 and images were taken using a BZ-X710 microscope (Keyence). Images were analyzed  
412 using ImageJ software. Meningeal thickening was quantified from sections taken from  
413 three different mice per group, and six images per slide. Meningeal thickening was  
414 quantified across two points per image. KC protein from mouse brain homogenates was

415 detected by enzyme-linked immunosorbent assay according to the manufacturer's  
416 instructions (R&D systems).

417

#### 418 **Ethics Statement**

419 Animal experiments were approved by the Institutional Animal Care and Use Committee  
420 (IACUC) at University of Colorado Anschutz Medical Campus protocol #00316 and were  
421 performed using accepted veterinary standards. The University of Colorado Anschutz  
422 Medical Campus is AAALAC accredited; and its facilities meet and adhere to the  
423 standards in the "Guide for the Care and Use of Laboratory Animals".

424

#### 425 **Conflict of interest**

426 The authors have declared that no conflict of interest exists.

427

#### 428 **Acknowledgements**

429 We thank Kathryn Patras at the University of California San Diego for the CNCTC 10/84  
430 strain and Moutusee Islam in Kelli Palmer's lab at The University of Texas at Dallas for  
431 *E. faecium* 1,231,410 DNA.

432

433 The work was supported in part by T32 5T32AI052066-18 and F31 AI164674 for H.S.M,  
434 the Coordenação de Aperfeiçoamento de Pessoal de Nível Superior, Brazil (CAPES;  
435 finance code 001 to J.D.C.M), by grants R01NS116716 and R01AI153332 from the  
436 National Institutes of Health (NIH) to K.S.D and associated NIH/NINDS supplement from  
437 R01NS116716 to R.V, NIH grant R21AI130666 and the Cecil H. and Ida Green Chair in

438 Systems Biology Science to K.P, NIH grant R56AI139105 to K.P and Z.G, and NIH grant  
439 U54GM069338 to Z.G.

440

## 441 **References**

- 442 1. Roy H. Tuning the properties of the bacterial membrane with aminoacylated  
443 phosphatidylglycerol. *IUBMB Life*. 2009;61:940-53.
- 444 2. Adams HM, Joyce LR, Guan Z, Akins RL, Palmer KL. *Streptococcus mitis* and *S.*  
445 *oralis* Lack a Requirement for CdsA, the Enzyme Required for Synthesis of Major  
446 Membrane Phospholipids in Bacteria. *Antimicrobial agents and chemotherapy*.  
447 2017;61:e02552-16.
- 448 3. Joyce LR, Guan Z, Palmer KL. Phosphatidylcholine Biosynthesis in Mitis Group  
449 Streptococci via Host Metabolite Scavenging. *Journal of bacteriology*.  
450 2019;201:e00495-19.
- 451 4. Wilkinson HW. Group B Streptococcal Infection in Humans. *Annual Review of*  
452 *Microbiology*. 1978;32:41-57.
- 453 5. Doran KS, Nizet V. Molecular pathogenesis of neonatal Group B Streptococcal  
454 infection: No longer in its infancy. *Molecular Microbiology*. 2004;54:23-31.
- 455 6. Hall J, Adams NH, Bartlett L, Seale AC, Lamagni T, Bianchi-Jassir F, et al.  
456 Maternal Disease With Group B *Streptococcus* and Serotype Distribution Worldwide:  
457 Systematic Review and Meta-analyses. *Clinical infectious diseases : an official*  
458 *publication of the Infectious Diseases Society of America*. 2017;65:S112-S24.
- 459 7. Schuchat A. Epidemiology of Group B Streptococcal disease in the United  
460 States: shifting paradigms. *Clinical microbiology reviews*. 1998;11:497-513.
- 461 8. Edwards MS, Rench MA, Haffar AA, Murphy MA, Desmond MM, Baker CJ.  
462 Long-term sequelae of Group B Streptococcal meningitis in infants. *The Journal of*  
463 *pediatrics*. 1985;106:717-22.
- 464 9. Ohlsson A, Shah VS. Intrapartum antibiotics for known maternal Group B  
465 Streptococcal colonization. *The Cochrane database of systematic reviews*.  
466 2014:CD007467.
- 467 10. Armistead B, Oler E, Adams Waldorf K, Rajagopal L. The Double Life of Group B  
468 *Streptococcus*: Asymptomatic Colonizer and Potent Pathogen. *Journal of Molecular*  
469 *Biology*. 2019;431:2914-31.
- 470 11. Curtis J, Kim G, Wehr NB, Levine RL. Group B Streptococcal phospholipid  
471 causes pulmonary hypertension. *Proceedings of the National Academy of Sciences of*  
472 *the United States of America*. 2003;100:5087-90.
- 473 12. Fischer W. The polar lipids of Group B Streptococci. II. Composition and  
474 positional distribution of fatty acids. *Biochimica et biophysica acta*. 1977;487:89-104.
- 475 13. Joyce LR, Guan Z, Palmer KL. *Streptococcus pneumoniae*, *S. pyogenes* and *S.*  
476 *agalactiae* membrane phospholipid remodelling in response to human serum.  
477 *Microbiology (Reading)*. 2021;167(5).

- 478 14. Doran KS, Engelson EJ, Khosravi A, Maisey HC, Fedtke I, Equils O, et al. Blood-  
479 brain barrier invasion by Group B *Streptococcus* depends upon proper cell-surface  
480 anchoring of lipoteichoic acid. *The Journal of clinical investigation*. 2005;115:2499-507.
- 481 15. Slavetinsky C, Kuhn S, Peschel A. Bacterial aminoacyl phospholipids -  
482 Biosynthesis and role in basic cellular processes and pathogenicity. *Biochimica et*  
483 *biophysica acta Molecular and cell biology of lipids*. 2017;1862:1310-8.
- 484 16. Peschel A, Jack RW, Otto M, Collins LV, Staubitz P, Nicholson G, et al.  
485 *Staphylococcus aureus* resistance to human defensins and evasion of neutrophil killing  
486 via the novel virulence factor MprF is based on modification of membrane lipids with L-  
487 lysine. *Journal of Experimental Medicine*. 2001;193:1067-76.
- 488 17. Weidenmaier C, Peschel A, Kempf VA, Lucindo N, Yeaman MR, Bayer AS.  
489 DltABCD- and MprF-mediated cell envelope modifications of *Staphylococcus aureus*  
490 confer resistance to platelet microbicidal proteins and contribute to virulence in a rabbit  
491 endocarditis model. *Infect Immun*. 2005;73(12):8033-8.
- 492 18. Kuypers JM, Heggen LM, Rubens CE. Molecular analysis of a region of the  
493 Group B *Streptococcus* chromosome involved in type III capsule expression. *Infection*  
494 and immunity. 1989;57:3058-65.
- 495 19. Lancefield RC, McCarty M, Everly WN. Multiple mouse-protective antibodies  
496 directed against Group B Streptococci. Special reference to antibodies effective against  
497 protein antigens. *The Journal of experimental medicine*. 1975;142:165-79.
- 498 20. Wilkinson HW. Nontypable Group B Streptococci isolated from human sources.  
499 *Journal of clinical microbiology*. 1977;6:183-4.
- 500 21. Smith CA, O'Maille G, Want EJ, Qin C, Trauger SA, Brandon TR, et al. METLIN:  
501 a metabolite mass spectral database. *Ther Drug Monit*. 2005;27(6):747-51.
- 502 22. Sud M, Fahy E, Cotter D, Brown A, Dennis EA, Glass CK, et al. LMSD: LIPID  
503 MAPS structure database. *Nucleic Acids Res*. 2007;35(Database issue):D527-32.
- 504 23. Roy H, Ibba M. RNA-dependent lipid remodeling by bacterial multiple peptide  
505 resistance factors. *Proceedings of the National Academy of Sciences of the United*  
506 *States of America*. 2008;105:4667-72.
- 507 24. Deng L, Spencer BL, Holmes JA, Mu R, Rego S, Weston TA, et al. The Group B  
508 Streptococcal surface antigen I/II protein, BspC, interacts with host vimentin to promote  
509 adherence to brain endothelium and inflammation during the pathogenesis of  
510 meningitis. *PLoS pathogens*. 2019;15:e1007848.
- 511 25. Spencer BL, Deng L, Patras KA, Burcham ZM, Sanches GF, Nagao PE, et al.  
512 Cas9 contributes to Group B Streptococcal colonization and disease. *Frontiers in*  
513 *Microbiology*. 2019;10:1-15.
- 514 26. Faralla C, Metruccio MM, De Chiara M, Mu R, Patras KA, Muzzi A, et al. Analysis  
515 of two-component systems in Group B *Streptococcus* shows that RgfAC and the novel  
516 FspSR modulate virulence and bacterial fitness. *mBio*. 2014;5(3):e00870-14.
- 517 27. Spencer BL, Chatterjee A, Duerkop BA, Baker CJ, Doran KS. Complete Genome  
518 Sequence of Neonatal Clinical Group B Streptococcal Isolate CJB111. *Microbiology*  
519 resource announcements. 2021;10.
- 520 28. Mu R, Cutting AS, Del Rosario Y, Villarino N, Stewart L, Weston TA, et al.  
521 Identification of CiaR Regulated Genes That Promote Group B Streptococcal Virulence  
522 and Interaction with Brain Endothelial Cells. *PLoS One*. 2016;11(4):e0153891.

- 523 29. Ernst CM, Kuhn S, Slavetinsky CJ, Krismer BB, Heilbronner S, Gekeler C, et al.  
524 The Lipid-Modifying Multiple Peptide Resistance Factor Is an Oligomer Consisting of  
525 Distinct Interacting Synthase and Flippase subunits. *mBio*. 2015;6:1-9.
- 526 30. Roy H, Ibba M. Broad range amino acid specificity of RNA-dependent lipid  
527 remodeling by multiple peptide resistance factors. *Journal of Biological Chemistry*.  
528 2009;284:29677-83.
- 529 31. Hebecker S, Krausze J, Hasenkampf T, Schneider J, Groenewold M, Reichelt J,  
530 et al. Structures of two bacterial resistance factors mediating tRNA-dependent  
531 aminoacylation of phosphatidylglycerol with lysine or alanine. *Proceedings of the*  
532 *National Academy of Sciences of the United States of America*. 2015;112:10691-6.
- 533 32. Lennarz WJ, Nesbitt JA, Reiss J. The participation of sRNA in the enzymatic  
534 synthesis of O-L-lysyl phosphatidylglycerol in *Staphylococcus aureus*. *Proceedings of the*  
535 *National Academy of Sciences of the United States of America*. 1966;55:934-41.
- 536 33. Saar-Dover R, Bitler A, Nezer R, Shmuel-Galia L, Firon A, Shimoni E, et al. D-  
537 alanylation of lipoteichoic acids confers resistance to cationic peptides in Group B  
538 *Streptococcus* by increasing the cell wall density. *PLoS pathogens*. 2012;8:e1002891.
- 539 34. Surve MV, Anil A, Kamath KG, Bhutda S, Sthanam LK, Pradhan A, et al.  
540 Membrane Vesicles of Group B *Streptococcus* Disrupt Feto-Maternal Barrier Leading to  
541 Preterm Birth. *PLOS Pathogens*. 2016;12:e1005816.
- 542 35. Reichmuth AM, Oberli MA, Jaklenec A, Langer R, Blankschtein D. mRNA  
543 vaccine delivery using lipid nanoparticles. *Ther Deliv*. 2016;7(5):319-34.
- 544 36. Hafez IM, Maurer N, Cullis PR. On the mechanism whereby cationic lipids  
545 promote intracellular delivery of polynucleic acids. *Gene Ther*. 2001;8(15):1188-96.
- 546 37. Van De Rijn I, Kessler RE. Growth characteristics of Group A Streptococci in a  
547 new chemically defined medium. *Infection and Immunity*. 1980;27:444-8.
- 548 38. Chang JC, LaSarre B, Jimenez JC, Aggarwal C, Federle MJ. Two Group A  
549 Streptococcal peptide pheromones act through opposing rgg regulators to control  
550 biofilm development. *PLoS Pathogens*. 2011;7:e1002190.
- 551 39. Gupta R, Shah P, Swiatlo E. Differential gene expression in *Streptococcus*  
552 *pneumoniae* in response to various iron sources. *Microbial Pathogenesis*. 2009;47:101-  
553 9.
- 554 40. Granok AB, Parsonage D, Ross RP, Caparon MG. The RofA binding site in  
555 *Streptococcus pyogenes* is utilized in multiple transcriptional pathways. *Journal of*  
556 *bacteriology*. 2000;182:1529-40.
- 557 41. Jeng A, Sakota V, Li Z, Datta V, Beall B, Nizet V. Molecular genetic analysis of a  
558 Group A *Streptococcus* operon encoding serum opacity factor and a novel fibronectin-  
559 binding protein, SfbX. *J Bacteriol*. 2003;185(4):1208-17.
- 560 42. Hooven TA, Bonakdar M, Chamby AB, Ratner AJ. A Counterselectable Sucrose  
561 Sensitivity Marker Permits Efficient and Flexible Mutagenesis in *Streptococcus*  
562 *agalactiae*. *Applied and environmental microbiology*. 2019;85:1-13.
- 563 43. Holo H, Nes IF. High-frequency transformation, by electroporation, of  
564 *Lactococcus lactis* subsp. *cremoris* grown with glycine in osmotically stabilized media.  
565 *Applied and Environmental Microbiology*. 1989;55:3119-23.
- 566 44. Framson PE, Nittayajarn A, Merry J, Youngman P, Rubens CE. New genetic  
567 techniques for Group B Streptococci: High-efficiency transformation, maintenance of



- 568 temperature-sensitive pWV01 plasmids, and mutagenesis with Tn917. *Applied and*  
569 *Environmental Microbiology*. 1997;63:3539-47.
- 570 45. Tan BK, Bogdanov M, Zhao J, Dowhan W, Raetz CRH, Guan Z. Discovery of a  
571 cardiolipin synthase utilizing phosphatidylethanolamine and phosphatidylglycerol as  
572 substrates. *Proceedings of the National Academy of Sciences*. 2012;109:16504-9.
- 573 46. Li C, Tan BK, Zhao J, Guan Z. In vivo and in vitro synthesis of  
574 phosphatidylglycerol by an *Escherichia coli* cardiolipin synthase. *Journal of Biological*  
575 *Chemistry*. 2016;291:25144-53.
- 576 47. Kim BJ, Hancock BM, Bermudez A, Del Cid N, Reyes E, van Sorge NM, et al.  
577 Bacterial induction of Snail1 contributes to blood-brain barrier disruption. *The Journal of*  
578 *clinical investigation*. 2015;125:2473-83.
- 579 48. Banerjee A, Kim BJ, Carmona EM, Cutting AS, Gurney MA, Carlos C, et al.  
580 Bacterial Pili exploit integrin machinery to promote immune activation and efficient  
581 blood-brain barrier penetration. *Nature communications*. 2011;2:462.

582

583

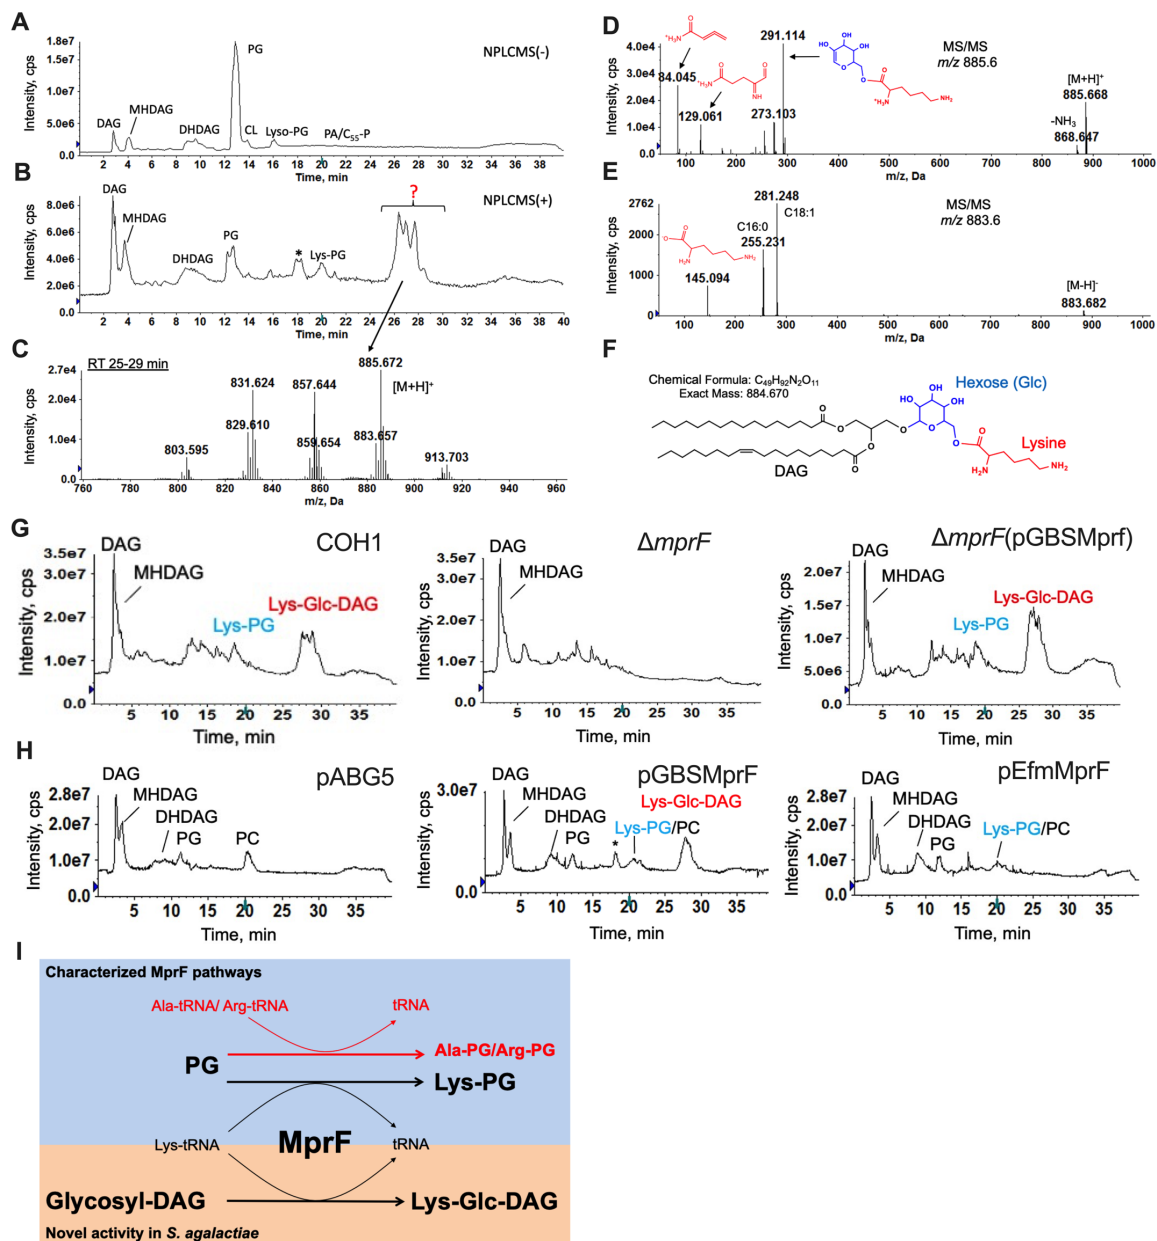

584  
 585 **Fig 1. Lipidomic profiling of GBS and identification of Lys-Glc-DAG synthesized by**  
 586 **MprF.** Total ion chromatogram (TIC) of LC/MS in A) negative ion mode, B) positive ion  
 587 mode shows a major unknown lipid eluting at ~25-29 min. C) Positive ESI/MS showing  
 588 the  $[M+H]^+$  ions of the unknown lipid. D) Positive ion MS/MS spectrum of  $[M+H]^+$  at  $m/z$   
 589 885.6 and E) negative ion MS/MS spectrum of  $[M-H]^-$  at  $m/z$  883.6 of the unknown lipid.  
 590 Lys-Glc-DAG (16:0/18:1) is proposed as the structure of the unknown lipid. G) TIC  
 591 showing loss of Lys-Glc-DAG and Lys-PG in COH1 $\Delta mprF$  which is present when *mprF* is  
 592 complemented *in trans*. H) Lys-Glc-DAG and Lys-PG is only present in *S. mitis* when  
 593 expressing GBS *mprF* compared to Lys-PG only when expressing *E. faecium mprF*. “\*”  
 594 denotes methylcarbamate of Lys-Glc-DAG, an extraction artifact due to the use of  
 595 chloroform. I) Biosynthetic pathways involving MprF.



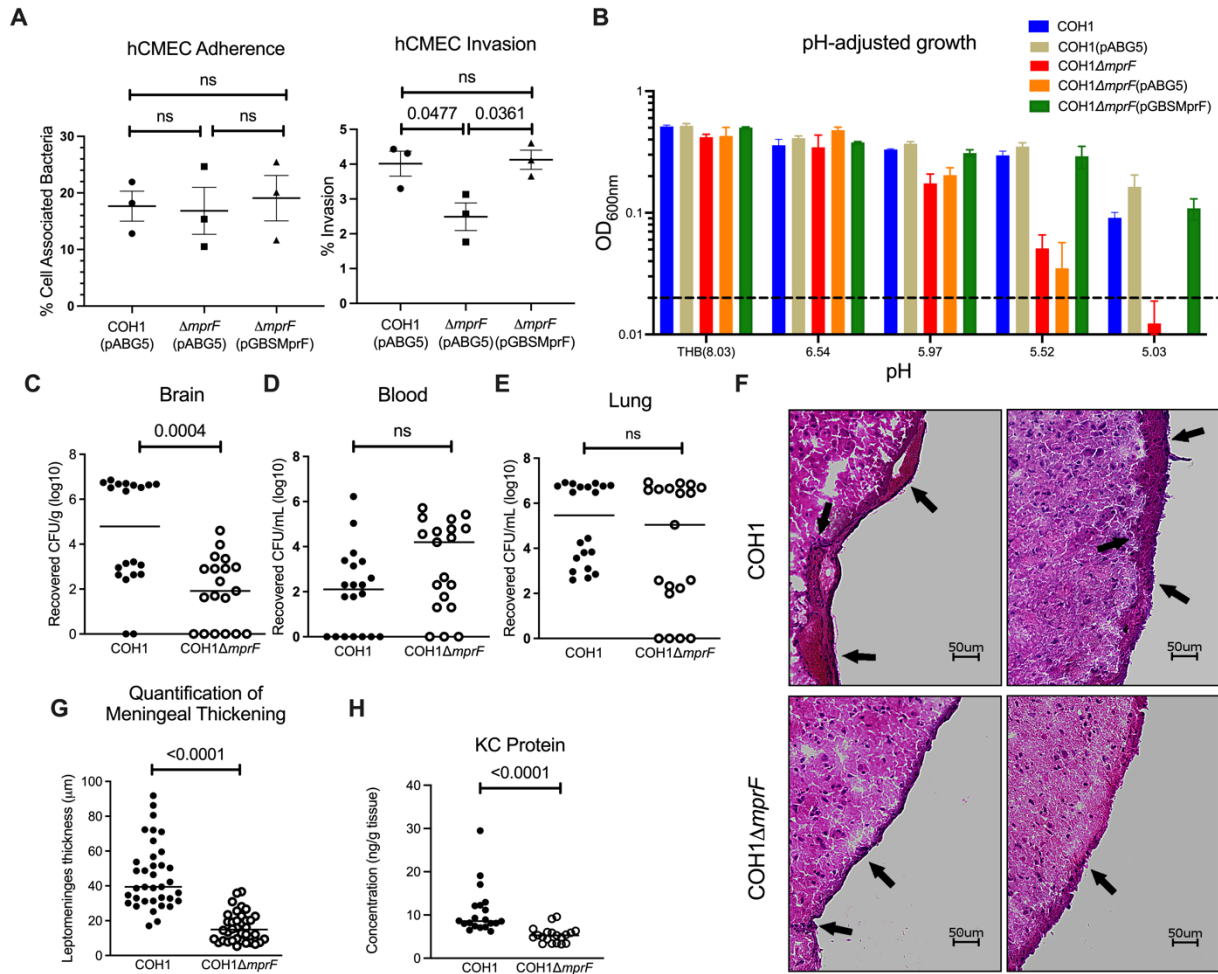

596

597

598

599

600

601

602

603

604

605

606

607

608

609

610

611

612

613

**Fig 2. Contribution of lysine lipids to meningitis pathogenesis.** A) *In vitro* assays for adherence and invasion of hCMEC cells indicates *mprF* contributes to invasion but not adherence to brain endothelium (the mean of each biological replicate is displayed, comprised of 4 replicate wells per biological replicate, mean and SEM). B) pH-adjusted medium growth indicates  $\Delta mprF$  cannot survive in low pH conditions, mean and SD. Groups of CD-1 mice were injected intravenously with COH1 WT or COH1 $\Delta mprF$  strains and bacterial counts were assessed in the C) brain, D) blood, and E) lung after 72h. Representative data from 2 independent experiments are shown (WT,  $n = 20$ ;  $\Delta mprF$ ,  $n = 19$ ). F) Hematoxylin-eosin-stained brain sections from representative mice infected with WT (top) or  $\Delta mprF$  mutant (bottom); arrows indicate meningeal thickening and leukocyte infiltration. G) Quantification of meningeal thickening using ImageJ. H) KC chemokine production measured by ELISA. Panels C, D, E, G, and H) median indicated. Statistical analyses performed using GraphPad Prism: A) One-way ANOVA with Tukey's multiple comparisons test; C, D, F) unpaired two-tailed t-test; E, G) Mann-Whitney U test; p-values indicated; ns, no significance (p-value > 0.05).

614  
615  
616  
617  
618  
619  
620  
621  
622  
623  
624  
625  
626  
627  
628  
629  
630  
631

## Supplemental Figures, and Tables

### Identification of a novel cationic glycolipid in *Streptococcus agalactiae* that contributes to brain entry and meningitis

Luke R. Joyce<sup>a,b</sup>, Haider S. Manzer<sup>b</sup>, Jéssica da C. Mendonça<sup>b,c</sup>, Ricardo Villarreal<sup>b</sup>,  
Prescilla E. Nagao<sup>c</sup>, Kelly S. Doran<sup>b#</sup>, Kelli L. Palmer<sup>a#</sup>, and Ziqiang Guan<sup>d#</sup>

<sup>a</sup>Department of Biological Sciences, The University of Texas at Dallas, Richardson, TX,  
75080

<sup>b</sup>Department of Immunology and Microbiology, University of Colorado School of  
Medicine, Aurora, CO, 80045

<sup>c</sup>Rio de Janeiro State University, Roberto Alcântara Gomes Biology Institute, Rio de  
Janeiro, RJ, Brazil

<sup>d</sup>Department of Biochemistry, Duke University Medical Center, Durham, NC, 27710

<sup>#</sup>Corresponding authors

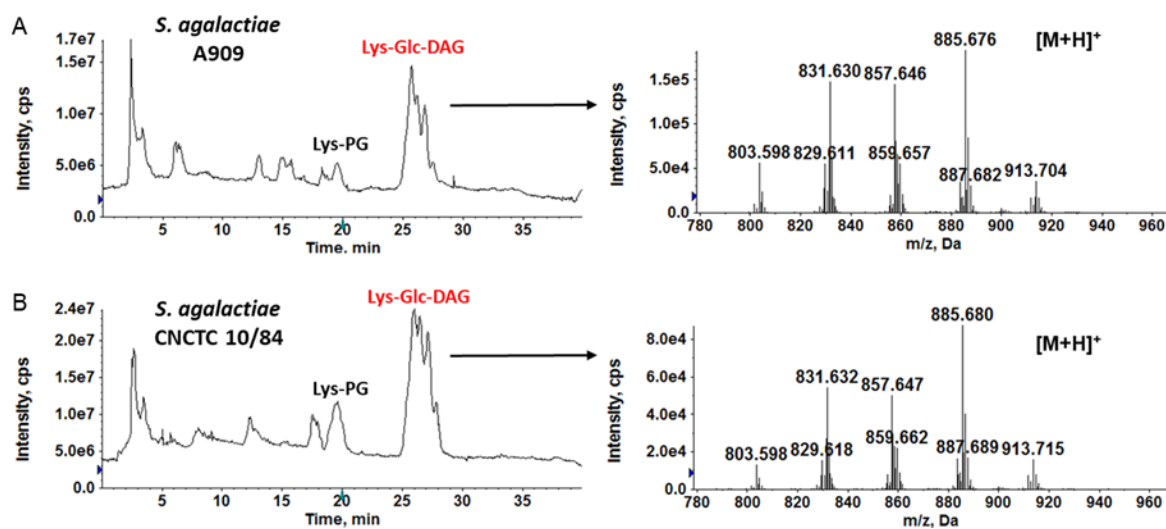

632

633 **S1 Fig. Detection of Lys-PG and Lys-Glc-DAG in *S. agalactiae* A909 and *S.***  
634 ***agalactiae* CNCTC 10/84.** Positive TICs (left panels) showing the presence of Lys-PG  
635 and Lys-Glc-DAG in *S. agalactiae* A909 and *S. agalactiae* CNCTC 10/84. Mass spectra  
636 (right panels) show the [M+H]<sup>+</sup> ions of Lys-Glc-DAG.

637

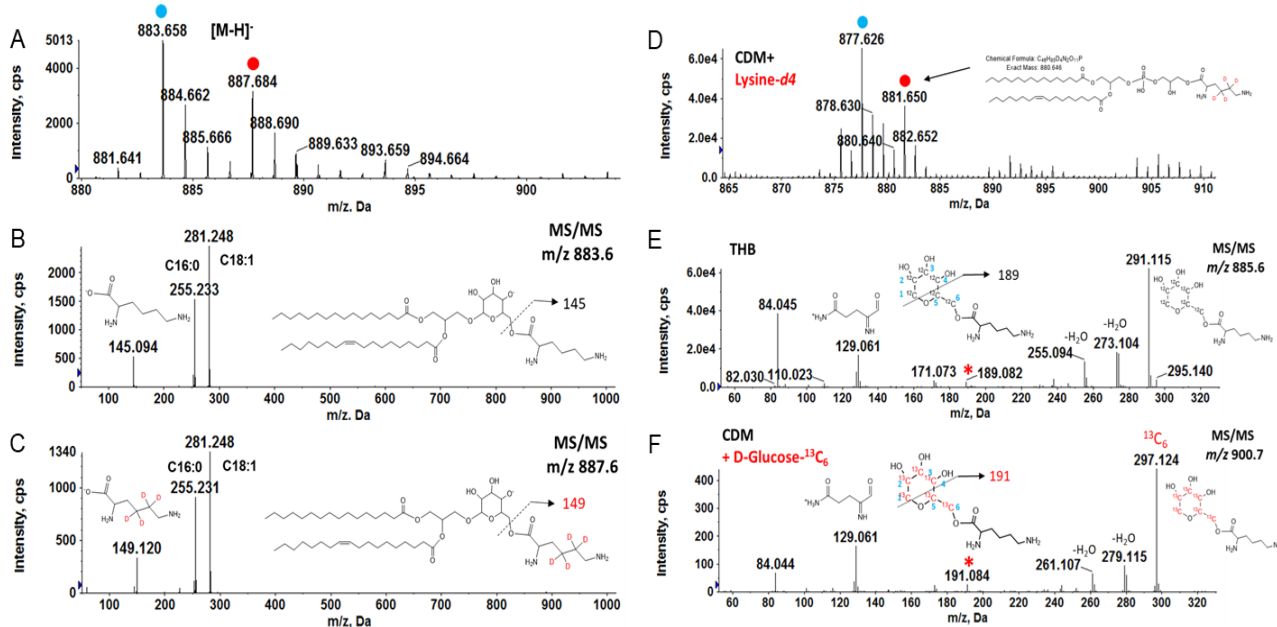

638  
 639 **S2 Fig. Isotopic incorporation of deuterated lysine and  $^{13}\text{C}$ -labeled glucose into**  
 640 **Lys-Glc-DAG and Lys-PG.** The lipid extracts of *S. agalactiae* COH1 cultured in DM, DM  
 641 supplemented with 450  $\mu\text{M}$  L-lysine-*d*4 (4,4,5,5- $\text{D}_4$ ), or in DM containing 0.5% w/v D-  
 642 Glucose ( $\text{U-}^{13}\text{C}_6$ ) were analyzed by LC-ESI/MS in the positive ion mode. A) Negative  
 643 ESI/MS of  $[\text{M-H}]^-$  ions of major Lys-Glc-DAG species in *S. agalactiae* COH1 when  
 644 cultured in DM supplemented with lysine-*d*4. The incorporation of lysine-*d*4 into Lys-Glc-  
 645 DAG is evidenced by an upward  $m/z$  shift of 4 Da of the  $[\text{M-H}]^-$  ion (from  $m/z$  883 to  $m/z$   
 646 887). B) MS/MS of  $[\text{M-H}]^-$  at  $m/z$  883.6 produces a deprotonated lysine residue at  $m/z$   
 647 145. C) MS/MS of  $[\text{M-H}]^-$  at  $m/z$  887.6 produces a deprotonated lysine-*d*4 residue at  $m/z$   
 648 149. D)  $[\text{M+H}]^+$  ions of major Lys-PG species in *S. agalactiae* COH1 cultured in DM  
 649 supplemented with lysine-*d*4. The incorporation of lysine-*d*4 in Lys-PG is evidenced by  
 650 an upward  $m/z$  shift of 4 Da from unlabeled Lys-PG (blue dot) to labeled Lys-PG (red dot).  
 651 E) MS/MS of 885.6. A major product ion at  $m/z$  291.1 is derived from glucose-lysine  
 652 residue. F) MS/MS of  $m/z$  900.7 (containing fifteen  $^{13}\text{C}$  atoms). The presence of  $m/z$  297.1  
 653 (with 6 Da shift) is consistent with glucose in Lys-Glc-DAG is replaced with D-Glucose ( $\text{U-}^{13}\text{C}_6$ ).  
 654 The other nine  $^{13}\text{C}$  atoms are incorporated into the DAG portion of Lys-Glc-DAG.  
 655 Furthermore, MS/MS data indicate that lysine is linked to the C6 position of glucose by  
 656 the fragmentation schemes for forming  $m/z$  189 ion from the unlabeled Lys-Glc-DAG and  
 657  $m/z$  191 ion from the  $^{13}\text{C}$ -labeled Lys-Glc-DAG.

658

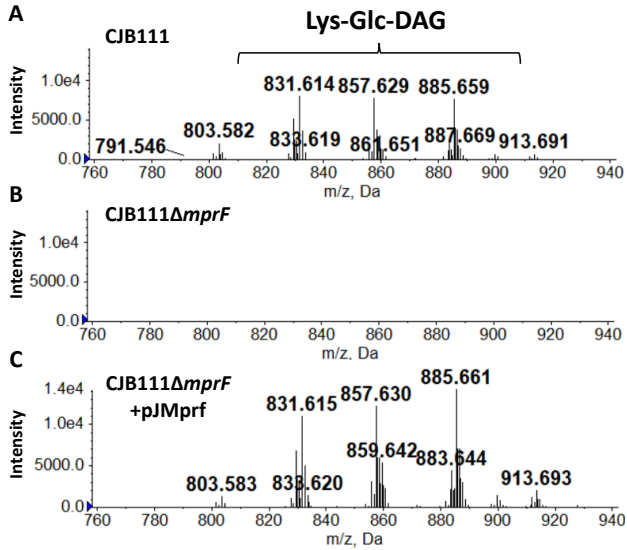

659

660 **S3 Fig. Positive ion mass spectra of retention time 27-29 minutes of hypervirulent**  
661 **CJB111 strain.** Lys-Glc-DAG is present in the membrane of WT CJB111 (A). Deletion of  
662 *mprF* from CJB111 genome results in loss of Lys-Glc-DAG from the membrane (B). *MprF*  
663 complemented *in trans* reestablishes Lys-Glc-DAG back into the membrane (C).

664

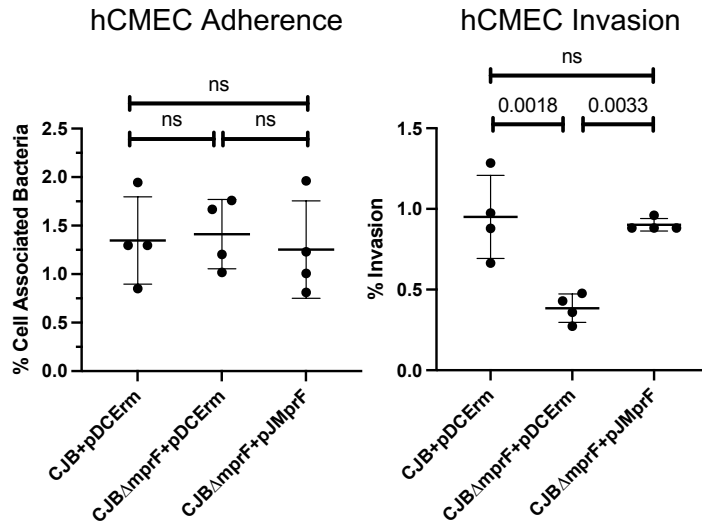

665

666 **S4 Fig. *In vitro* hCMEC adhesion and invasion of CJB111 strains.** *In vitro* assays for  
667 adhesion and invasion of hCMEC cells indicates *mprF* contributes to invasion but not  
668 adhesion to brain endothelium. Data indicates the percentage of the initial inoculum that  
669 was recovered. Experiments were performed three times with each condition in  
670 quadruplicate. Data from one representative experiment is shown, mean and standard  
671 deviation indicated. One-Way ANOVA with Tukey's multiple comparisons statistical test  
672 was used. P-values indicated; ns, not significant.

673 **S1 Table. Observed and calculated exact masses of the [M+H]<sup>+</sup> ions of Lys-Glc-**  
674 **DAG molecular species in *S. agalactiae* COH1.**

| Lys-Glc-<br>DAG <sup>1</sup> | [M+H] <sup>+</sup> |               |
|------------------------------|--------------------|---------------|
|                              | Observed<br>mass   | Exact<br>mass |
| C28:1                        | 801.575            | 801.583       |
| C28:0                        | 803.595            | 803.599       |
| C30:1                        | 829.610            | 829.615       |
| C30:0                        | 831.624            | 831.630       |
| C32:2                        | 855.623            | 855.630       |
| C32:1                        | 857.644            | 857.646       |
| C34:2                        | 883.657            | 883.622       |
| C34:1                        | 885.672            | 885.677       |
| C36:2                        | 911.686            | 911.693       |
| C36:1                        | 913.703            | 913.709       |

675

676 <sup>1</sup>The numbers before and after colons indicate the total acyl chain carbon atoms and  
677 double bonds, respectively.

678 **S2 Table. Strains and plasmids used in this study.**

| Organism             | Strain                                                                              | Description                                                                                                                                                                                                                                                                            | Ref       |
|----------------------|-------------------------------------------------------------------------------------|----------------------------------------------------------------------------------------------------------------------------------------------------------------------------------------------------------------------------------------------------------------------------------------|-----------|
| <i>S. agalactiae</i> | ATCC BAA-1176 (COH1)                                                                | Wild-type <i>S. agalactiae</i> strain, serotype III                                                                                                                                                                                                                                    | (1)       |
|                      | COH1 $\Delta$ <i>mprF</i>                                                           | <i>mprF</i> (GBSCOH1_1931) deletion strain                                                                                                                                                                                                                                             | This work |
|                      | COH1 $\Delta$ <i>mprF</i> (pABG5)                                                   | Empty vector control strain                                                                                                                                                                                                                                                            | This work |
|                      | COH1 $\Delta$ <i>mprF</i> (pGBSMprf)                                                | Expresses GBS <i>mprF</i> from P <sub>prtF</sub> in pABG5 $\Delta$ <i>phoZ</i>                                                                                                                                                                                                         | This work |
|                      | COH1(pABG5)                                                                         | Empty vector control                                                                                                                                                                                                                                                                   | This work |
|                      | CJB111                                                                              | Wild-type <i>S. agalactiae</i> strain, serotype V                                                                                                                                                                                                                                      | (2, 3)    |
|                      | CJB111 $\Delta$ <i>mprF</i>                                                         | <i>mprF</i> (ID870_10050) deletion strain                                                                                                                                                                                                                                              | This work |
|                      | CJB111 $\Delta$ <i>mprF</i> (pDCErm)                                                | Empty vector control strain                                                                                                                                                                                                                                                            | This work |
|                      | CJB111 $\Delta$ <i>mprF</i> (pJMprF)                                                | Expresses GBS <i>mprF</i> in pDCErm                                                                                                                                                                                                                                                    | This work |
|                      | ATCC BAA-1138 (A909)                                                                | Wild-type <i>S. agalactiae</i> strain, serotype Ia                                                                                                                                                                                                                                     | (4)       |
| CNCTC 10/84          | Wild-type <i>S. agalactiae</i> strain, serotype V. Obtained from Dr. K Patras, UCSD | (5, 6)                                                                                                                                                                                                                                                                                 |           |
| <i>S. mitis</i>      | ATCC 49456                                                                          | Wild-type <i>S. mitis</i> type strain, also known as NCTC 12261                                                                                                                                                                                                                        | (7)       |
|                      | ATCC 49456(pABG5)                                                                   | Empty vector control                                                                                                                                                                                                                                                                   | This work |
|                      | ATCC 49456(pGBSMprF)                                                                | Expresses GBS <i>mprF</i> from P <sub>prtF</sub> in pABG5 $\Delta$ <i>phoZ</i>                                                                                                                                                                                                         | This work |
|                      | ATCC 49456(pEfmMprF)                                                                | Expresses <i>E. faecium mprF1</i> from P <sub>prtF</sub> in pABG5 $\Delta$ <i>phoZ</i>                                                                                                                                                                                                 | This work |
| <i>E. coli</i>       | DH5 $\alpha$                                                                        | Plasmid cloning host; F <sup>-</sup> , $\phi$ 80/ <i>lacZ</i> $\Delta$ M15, <i>recA1</i> , <i>endA1</i> , <i>hsdR17</i> , <i>phoA</i> , <i>s</i> <sub>upE44</sub> , $\lambda$ <sup>-</sup> <i>thi-1</i> , <i>gyrA96</i> , <i>relA1</i>                                                 | (8)       |
|                      | DH5 $\alpha$ (pABG5)                                                                | Empty vector control                                                                                                                                                                                                                                                                   | This work |
|                      | MC1061                                                                              | Plasmid cloning host; F <sup>-</sup> , <i>araD139</i> , $\Delta$ ( <i>araABC-leu</i> )7696, $\Delta$ ( <i>lac</i> )X74, <i>galU</i> , <i>galK</i> , <i>hsdR2</i> , ( <i>r</i> $\kappa$ <sup>-</sup> <i>m</i> $\kappa$ <sup>+</sup> ), <i>mcrB1</i> , <i>rpsL</i> , (Str <sup>r</sup> ) | (9)       |
|                      | MC1061(pDCErm)                                                                      | Empty vector control                                                                                                                                                                                                                                                                   | This work |
|                      | DH5 $\alpha$ (pGBSMprF)                                                             | Expresses COH1 <i>mprF</i> (GBSCOH1_1931) from P <sub>prtF</sub> in pABG5 $\Delta$ <i>phoZ</i>                                                                                                                                                                                         | This work |



|                            | DH5 $\alpha$ (pEfmMprF)                                                                                                                                     | Expresses <i>E. faecium</i> <i>mprF1</i> from P <sub>prtF</sub> in pABG5 $\Delta$ <i>phoZ</i> | This work |
|----------------------------|-------------------------------------------------------------------------------------------------------------------------------------------------------------|-----------------------------------------------------------------------------------------------|-----------|
|                            | DH5 $\alpha$ (pMBMprFKO)                                                                                                                                    | Allelic exchange plasmid containing ~2 kb sequence flanking GBSCOH1_1931                      | This work |
|                            | MC1061(pJMprFKO)                                                                                                                                            | Allelic exchange plasmid containing ~2 kb sequence flanking ID870_10050                       | This work |
|                            | MC1061(pJMprF)                                                                                                                                              | Expresses CJB11 <i>mprF</i> from P <sub>tetM/erm</sub> in pDCErm                              | This work |
| <i>E. faecium</i>          | 1,231,410                                                                                                                                                   | Wild type <i>E. faecium</i> strain                                                            | (10)      |
| Plasmid                    | Description                                                                                                                                                 |                                                                                               | Ref       |
| pABG5 $\Delta$ <i>phoZ</i> | Constitutive expression vector for streptococci with the P <sub>prtF</sub> promoter. Confers kanamycin resistance. Referred to as pABG5 throughout the text |                                                                                               | (11)      |
| pGBSMprF                   | pABG5 $\Delta$ <i>phoZ</i> expressing COH1 <i>mprF</i> (GBSCOH1_1931) from P <sub>prtF</sub>                                                                |                                                                                               | This work |
| pEfmMprF                   | pABG5 $\Delta$ <i>phoZ</i> expressing <i>E. faecium</i> 1,231,410 <i>mprF1</i> (EFTG_00601) from P <sub>prtF</sub>                                          |                                                                                               | This work |
| pMBSacB                    | Allelic exchange plasmid for <i>S. agalactiae</i> . Confers erythromycin resistance and sucrose sensitivity                                                 |                                                                                               | (12)      |
| pMBMprFKO                  | Knockout plasmid containing ~2 kb sequence flanking GBSCOH1_1931                                                                                            |                                                                                               | This work |
| pJMprFKO                   | Knockout plasmid containing ~2 kb sequence flanking ID870_10050                                                                                             |                                                                                               | This work |
| pDCErm                     | Constitutive expression vector for streptococcus from P <sub>tetM/erm</sub>                                                                                 |                                                                                               | (13)      |
| pJMprF                     | pDCErm expressing CJB111 <i>mprF</i> (ID870_10050)                                                                                                          |                                                                                               | This work |

679

680

681 **S3 Table. Primers used in this study.**

| Primer                                                                                   | 5' – 3' sequence                                 | Use                                                                                                                  |
|------------------------------------------------------------------------------------------|--------------------------------------------------|----------------------------------------------------------------------------------------------------------------------|
| GBS_MprF_F                                                                               | GAGAGGTCCTTTCC TTGAAAAAGC<br>TAATTGAAAAAGTC      | Amplify GBSCOH1_1931 for Gibson assembly                                                                             |
| GBS_MprF_R                                                                               | ACCAATACCTTTATC TTTATTTAACAA<br>TCTTAATTTTACTATC | Amplify GBSCOH1_1931 for Gibson assembly                                                                             |
| Faec_MprF1_F                                                                             | GAGAGGTCCTTTCC TTGTAAAAA<br>ATACCATAACAATG       | Amplify EFTG_00601 for Gibson assembly                                                                               |
| Faec_MprF1_R                                                                             | ACCAATACCTTTATC TTAATACTTTC<br>TTCGTATCC         | Amplify EFTG_00601 for Gibson assembly                                                                               |
| MpF_SacII                                                                                | ACGTCA CCGCGG TTGAAAAAGCTAA<br>TTGAAAAAGTC       | Amplify CJB111 <i>mprF</i> ID870_10050 for ligation                                                                  |
| MpR_BamHI                                                                                | ACGTCA GGATCC TTTATTTAACAACTCT<br>TAATTTTACTATC  | Amplify CJB111 <i>mprF</i> ID870_10050 for ligation                                                                  |
| pABG5-5'                                                                                 | GGAAAGGGACCTCTCTCCTAAAC                          | Linearize pABG5Δ <i>phoZ</i> for Gibson assembly                                                                     |
| pABG5-3'                                                                                 | GATAAAGGTATTGGTAAATAACAAA                        | Linearize pABG5Δ <i>phoZ</i> for Gibson assembly                                                                     |
| <b>Expression plasmid sequencing</b>                                                     |                                                  |                                                                                                                      |
| GBS_S1                                                                                   | GAATGGAATAATATAGTAGGCT                           | For sequencing pGBSMprF/pJMprF, amplifies with pABG5_Fup2/ pF                                                        |
| GBS_S2                                                                                   | GATTGTATCCCTTATTCC                               | For sequencing pGBSMprF/pJMprF, amplifies with GBS_S3                                                                |
| GBS_S3                                                                                   | CGATTCAATAGCTTCAC                                | For sequencing pGBSMprF/pJMprF, amplifies with GBS_S2                                                                |
| GBS_S4                                                                                   | GATAAAAGGCTCTACTGG                               | For sequencing pGBSMprF/pJMprF, amplifies with pABG5_FDwn/pR                                                         |
| pABG5_FDwn                                                                               | CCAATAATAATGACTAGAGAAG                           | For pABG5 plasmid insert sequencing                                                                                  |
| pABG5_Fup2                                                                               | CAAAGGTTTCGACTTTTCACC                            | For pABG5 plasmid insert sequencing                                                                                  |
| EF1_S1                                                                                   | GAATAACGCTGATCAAAAAGT                            | For sequencing pEfmMprF1, amplifies with pABG5_Fup2                                                                  |
| EF1_S2                                                                                   | TGCCAAGAGAAATAGTC                                | For sequencing pEfmMprF1, amplifies with EF1_S3                                                                      |
| EF1_S3                                                                                   | ACAATCTCTTCGCTTG                                 | For sequencing pEfmMprF1, amplifies with EF1_S2                                                                      |
| EF1_S4                                                                                   | CCAACTGTTCTTCTCAA                                | For sequencing pEfmMprF1, amplifies with pABG5_FDwn                                                                  |
| pF                                                                                       | AGCGCTAGGAGGAAAC                                 | For pDCErm plasmid insert sequencing                                                                                 |
| pR                                                                                       | CCCATGCCATCTCCAATC                               | For pDCErm plasmid insert sequencing                                                                                 |
| <b>GBSCOH1_1931 knockout plasmid construction, sequencing, and integration screening</b> |                                                  |                                                                                                                      |
| Mp1F_PstI                                                                                | ACGTCACTGCAG TTC AATTAGCTTTT<br>TCAACAATTTCC     | Amplifies upstream fragment from within GBSCOH1_1931/ID870_10050 leaving 6 codons, with Mp1R_XhoI                    |
| Mp1R_XhoI                                                                                | ACGTCACTGCAG GCTGTTTATGGTG<br>CTTTG              | 5' most primer of upstream fragment, amplifies with Mp1F_PstI                                                        |
| Mp2F_XbaI                                                                                | ACGTCACTAGAGAAAAGGCTAGAT<br>TACGAAC              | 3' most primer of downstream fragment, amplifies with Mp2R_PstI                                                      |
| Mp2R_PstI                                                                                | ACGTCACTGCAG GTTAAATAAGCTTT<br>ATTTGGCA          | Amplifies downstream fragment leaving 2 codons and stop codon of GBSCOH1_1931/ID870_10050, with Mp2F_XbaI            |
| T7 promoter                                                                              | TAATACGACTCACTATAGGG                             | Amplifies with MpS5F below to sequence plasmid, amplifies with T3 promoter for insert screening and plasmid presence |
| T3 promoter                                                                              | AATTAACCCTCACTAAAGGG                             | Amplifies with MpS3R below, amplifies with T7 promoter for insert screening and plasmid presence                     |
| Int_F                                                                                    | GCTAATTGAACTGCAGGTTAAATAA<br>G                   | Anneals at <i>mprF</i> knockout site, amplifies with Out_R for single integration screening                          |

|       |                            |                                                                                            |
|-------|----------------------------|--------------------------------------------------------------------------------------------|
| Out_R | GCTATTATATTTAGTGGTTTAATTGG | Anneals outside recombination arms, amplifies with Int_F, for single integration screening |
|-------|----------------------------|--------------------------------------------------------------------------------------------|

**Genomic knockout region sequencing**

---

|       |                       |                                                                        |
|-------|-----------------------|------------------------------------------------------------------------|
| MpS3F | CATTAGCTAGTCTTATCGGAG | Anneals outside integration arms, amplifies with MpS3R                 |
| MpS3R | ACAGCTACTTGGTAGTTCA   | Amplifies with MpS3F                                                   |
| MpS4F | GCTACTAAGGCAAGATACG   | Amplifies with MpS4R, knockout screening and plasmid sequencing primer |
| MpS4R | ATGGTCAGCGATGGTG      | Amplifies with MpS4F, knockout screening and plasmid sequencing primer |
| MpS5F | CATAAGCGAAATAACTTGAG  | Amplifies with MpS5R                                                   |
| MpS5R | GTATACAACGGCTTGATTGG  | Anneals outside integration arms, amplifies with MpS5F                 |

---

682

683

## 684 References

- 685 1. Kuypers JM, Heggen LM, Rubens CE. Molecular analysis of a region of the  
686 Group B *Streptococcus* chromosome involved in type III capsule expression. *Infection*  
687 and immunity. 1989;57:3058-65.
- 688 2. Faralla C, Metruccio MM, De Chiara M, Mu R, Patras KA, Muzzi A, et al. Analysis  
689 of two-component systems in group B *Streptococcus* shows that RgfAC and the novel  
690 FspSR modulate virulence and bacterial fitness. *mBio*. 2014;5(3):e00870-14.
- 691 3. Spencer BL, Chatterjee A, Duerkop BA, Baker CJ, Doran KS. Complete Genome  
692 Sequence of Neonatal Clinical Group B Streptococcal Isolate CJB111. *Microbiology*  
693 resource announcements. 2021;10.
- 694 4. Lancefield RC, McCarty M, Everly WN. Multiple mouse-protective antibodies  
695 directed against Group B Streptococci. Special reference to antibodies effective against  
696 protein antigens. *The Journal of experimental medicine*. 1975;142:165-79.
- 697 5. Hooven TA, Randis TM, Daugherty SC, Narechania A, Planet PJ, Tettelin H, et  
698 al. Complete Genome Sequence of *Streptococcus agalactiae* CNCTC 10/84, a  
699 Hypervirulent Sequence Type 26 Strain. *Genome announcements*. 2014;2:e01338-14.
- 700 6. Wilkinson HW. Nontypable Group B Streptococci isolated from human sources.  
701 *Journal of clinical microbiology*. 1977;6:183-4.
- 702 7. Kilian M, Mikkelsen L, Henrichsen J. Taxonomic Study of Viridans Streptococci:  
703 Description of *Streptococcus gordonii* sp. nov. and Emended Descriptions of  
704 *Streptococcus sanguis* (White and Niven 1946), *Streptococcus oralis* (Bridge and  
705 Sneath 1982), and *Streptococcus mitis* (Andrewes and Horder 1906). *International*  
706 *Journal of Systematic Bacteriology*. 1989;39:471-84.
- 707 8. Taylor RG, Walker DC, McInnes RR. *E. coli* host strains significantly affect the  
708 quality of small scale plasmid DNA preparations used for sequencing. *Nucleic acids*  
709 *research*. 1993;21:1677-8.
- 710 9. Casadaban MJ, Cohen SN. Analysis of gene control signals by DNA fusion and  
711 cloning in *Escherichia coli*. *J Mol Biol*. 1980;138(2):179-207.
- 712 10. Palmer KL, Carniol K, Manson JM, Heiman D, Shea T, Young S, et al. High-  
713 quality draft genome sequences of 28 *Enterococcus* sp. isolates. *Journal of*  
714 *bacteriology*. 2010;192:2469-70.
- 715 11. Granok AB, Parsonage D, Ross RP, Caparon MG. The RofA binding site in  
716 *Streptococcus pyogenes* is utilized in multiple transcriptional pathways. *Journal of*  
717 *bacteriology*. 2000;182:1529-40.
- 718 12. Hooven TA, Bonakdar M, Chamby AB, Ratner AJ. A Counterselectable Sucrose  
719 Sensitivity Marker Permits Efficient and Flexible Mutagenesis in *Streptococcus*  
720 *agalactiae*. *Applied and environmental microbiology*. 2019;85:1-13.
- 721 13. Jeng A, Sakota V, Li Z, Datta V, Beall B, Nizet V. Molecular genetic analysis of a  
722 group A *Streptococcus* operon encoding serum opacity factor and a novel fibronectin-  
723 binding protein, SfbX. *J Bacteriol*. 2003;185(4):1208-17.

724

725

726
